# Supplementary material for: Adipokines in early and mid-pregnancy and subsequent risk of gestational diabetes: a longitudinal study in a multiracial cohort
Source: PubMed Central journal article supplement — BMJ Open Diabetes Res Care. 2020 Aug 2;8(1):e001333. doi: 10.1136/bmjdrc-2020-001333 (PMC7398109; doi:10.1136/bmjdrc-2020-001333), 2020-08-02
Supplement: bmjdrc-2020-001333supp001.pdf [file bmjdrc-2020-001333supp001.pdf]

**Supplementary Table 1. Adipokine, glucose metabolism, and cardiometabolic marker assay information**

| <b>Biomarker</b> | <b>Inter-<br/>Intra- assay<br/>CVS</b>                                                                                 | <b>Kit</b>                                                              | <b>Manufacturer</b>       |
|------------------|------------------------------------------------------------------------------------------------------------------------|-------------------------------------------------------------------------|---------------------------|
| Chemerin         | 6.2% - 18.0%                                                                                                           | Quantikine Human Chemerin Immunoassay                                   | R & D Systems             |
| FABP4            | 8.1% - 10.2%                                                                                                           | Human FABP4 ELISA                                                       | BioVendor                 |
| RBP4             | 3.1% - 9.6%                                                                                                            | Quantikine Human RBP4 Immunoassa                                        | R & D Systems             |
| IL-6             | 8.1% - 14.4%                                                                                                           | Quantikine HS Human IL-6 Immunoassay                                    | R & D Systems             |
| Leptin           | 3.7% - 6.0%                                                                                                            | Quantitative direct sandwich enzyme immunoassay                         | Mercodia, Uppsala, Sweden |
| sOB-R            | 3.5% - 10.2%                                                                                                           | Quantikine Human Leptin sR                                              | R & D Systems             |
| Vaspin           | 14.4% - 16.2%                                                                                                          | Human Vaspin ELISA                                                      | BioVendor                 |
| Omentin1         | 8.5% - 11.1%                                                                                                           | Human Omentin-1 ELISA                                                   | Millipore                 |
| HMW-adiponectin  | 9.2% - 10.9%                                                                                                           | Human Adiponectin/Acrp30 Immunoassay                                    | R & D Systems             |
| Adiponectin      | 5.8% - 9.3%                                                                                                            | Human Adiponectin/Acrp30 Immunoassay                                    | R & D Systems             |
| Glucose          | 1.3% - 1.8%                                                                                                            | enzymatic assays with the use of the Roche Modular P Chemistry analyzer | Roche Diagnostics         |
| Insulin          | 3.3%                                                                                                                   | Roche Elecsys 2010 Analyzer                                             | Roche Diagnostics         |
| HbA1c            | 0.5% - 1.2%                                                                                                            | Non-porous ion Exchange High Performance Liquid Chromatography          | Tosoh Bioscience, Inc     |
| hsCRP            | 2.1% - 4.3%                                                                                                            | enzymatic assays with the use of the Roche Modular P Chemistry analyzer | Roche Diagnostics         |
| Triglycerides    | 2.0% - 2.3%                                                                                                            | Roche COBAS 6000 Chemistry Analyzer                                     | Roche Diagnostics         |
| HDL              | 1.9% - 3.2%                                                                                                            | Roche COBAS 6000 Chemistry Analyzer                                     | Roche Diagnostics         |
| LDL              | calculated by the Friedewald's formula: LDL cholesterol = total cholesterol – HDL cholesterol – triglycerides ÷ 5 [51] |                                                                         |                           |

**Supplementary Table 2 – Adjusted odds ratio (95% CI) for the associations of GDM risk with quartiles of adipokines at gestational weeks 10–14 and 15–26 adjusted for prepregnancy BMI**

|                        | GDM cases ( <i>n</i> ) | Controls ( <i>n</i> ) | Multivariable model III* |                          |
|------------------------|------------------------|-----------------------|--------------------------|--------------------------|
|                        |                        |                       | 10-14 GW                 | 15-26 GW                 |
| <b>FABP4</b>           |                        |                       |                          |                          |
| Q1:                    | 11                     | 54                    | 1.00                     | 1.00                     |
| Q2:                    | 27                     | 53                    | 2.40 (0.94, 6.18)        | <b>4.58 (1.22, 17.2)</b> |
| Q3:                    | 31                     | 54                    | <b>2.74 (1.04, 7.23)</b> | <b>6.66 (1.79, 24.8)</b> |
| Q4:                    | 35                     | 53                    | 2.45 (0.81, 7.38)        | <b>6.35 (1.50, 26.9)</b> |
| <i>P</i> for trend     |                        |                       | 0.27                     | <b>0.047</b>             |
| <b>Chemerin</b>        |                        |                       |                          |                          |
| Q1:                    | 9                      | 53                    | 1.00                     | 1.00                     |
| Q2:                    | 33                     | 53                    | <b>3.10 (1.23, 7.79)</b> | 1.23 (0.45, 3.33)        |
| Q3:                    | 22                     | 53                    | 2.25 (0.83, 6.06)        | 1.47 (0.51, 4.22)        |
| Q4:                    | 39                     | 53                    | <b>3.24 (1.16, 9.03)</b> | <b>3.87 (1.42, 10.5)</b> |
| <i>P</i> for trend     |                        |                       | 0.10                     | <b>0.002</b>             |
| <b>IL-6</b>            |                        |                       |                          |                          |
| Q1:                    | 6                      | 41                    | 1.00                     | 1.00                     |
| Q2:                    | 16                     | 40                    | <b>3.77 (1.15, 12.3)</b> | 1.39 (0.45, 4.29)        |
| Q3:                    | 23                     | 41                    | <b>3.30 (1.12, 9.68)</b> | 1.91 (0.63, 5.78)        |
| Q4:                    | 35                     | 40                    | <b>7.65 (2.25, 26.0)</b> | 2.32 (0.78, 6.89)        |
| <i>P</i> for trend     |                        |                       | <b>0.003</b>             | 0.11                     |
| <b>Leptin</b>          |                        |                       |                          |                          |
| Q1:                    | 18                     | 54                    | 1.00                     | 1.00                     |
| Q2:                    | 10                     | 53                    | 0.57 (0.23, 1.42)        | 0.71 (0.29, 1.72)        |
| Q3:                    | 28                     | 54                    | 1.49 (0.62, 3.58)        | 1.11 (0.44, 2.81)        |
| Q4:                    | 48                     | 53                    | 2.14 (0.82, 5.59)        | 1.88 (0.65, 5.43)        |
| <i>P</i> for trend     |                        |                       | <b>0.04</b>              | 0.12                     |
| <b>sOB-R</b>           |                        |                       |                          |                          |
| Q1:                    | 56                     | 54                    | 1.00                     | 1.00                     |
| Q2:                    | 21                     | 53                    | <b>0.42 (0.21, 0.85)</b> | <b>0.21 (0.09, 0.49)</b> |
| Q3:                    | 14                     | 54                    | <b>0.37 (0.17, 0.83)</b> | <b>0.11 (0.04, 0.34)</b> |
| Q4:                    | 13                     | 53                    | <b>0.33 (0.14, 0.76)</b> | <b>0.14 (0.05, 0.39)</b> |
| <i>P</i> for trend     |                        |                       | <b>0.002</b>             | <b>&lt;.0001</b>         |
| <b>Adiponectin</b>     |                        |                       |                          |                          |
| Q1:                    | 43                     | 54                    | 1.00                     | 1.00                     |
| Q2:                    | 29                     | 53                    | <b>0.65 (0.32, 1.31)</b> | 0.55 (0.26, 1.15)        |
| Q3:                    | 24                     | 54                    | <b>0.54 (0.26, 1.15)</b> | <b>0.30 (0.13, 0.69)</b> |
| Q4:                    | 8                      | 53                    | <b>0.17 (0.06, 0.49)</b> | <b>0.20 (0.07, 0.56)</b> |
| <i>P</i> for trend     |                        |                       | <b>0.001</b>             | <b>0.001</b>             |
| <b>HMW-Adiponectin</b> |                        |                       |                          |                          |
| Q1:                    | 45                     | 54                    | 1.00                     | 1.00                     |
| Q2:                    | 30                     | 53                    | <b>0.65 (0.32, 1.30)</b> | 0.82 (0.37, 1.80)        |
| Q3:                    | 18                     | 54                    | <b>0.38 (0.17, 0.83)</b> | <b>0.32 (0.14, 0.76)</b> |
| Q4:                    | 11                     | 53                    | <b>0.27 (0.11, 0.65)</b> | <b>0.27 (0.10, 0.71)</b> |
| <i>P</i> for trend     |                        |                       | <b>0.002</b>             | <b>0.002</b>             |
| <b>Omentin-1</b>       |                        |                       |                          |                          |
| Q1:                    | 24                     | 54                    | 1.00                     | 1.00                     |
| Q2:                    | 37                     | 53                    | 1.67 (0.77, 3.62)        | 1.57 (0.77, 3.21)        |
| Q3:                    | 19                     | 54                    | 0.97 (0.41, 2.28)        | 1.20 (0.51, 2.82)        |
| Q4:                    | 24                     | 53                    | 1.33 (0.54, 3.27)        | 1.30 (0.52, 3.20)        |
| <i>P</i> for trend     |                        |                       | 0.85                     | 0.70                     |
| <b>Vaspin</b>          |                        |                       |                          |                          |
| Q1:                    | 19                     | 52                    | 1.00                     | 1.00                     |

|                    |    |    |                          |                   |
|--------------------|----|----|--------------------------|-------------------|
| Q2:                | 22 | 52 | 1.67 (0.69, 4.05)        | 1.09 (0.46, 2.58) |
| Q3:                | 39 | 52 | <b>2.70 (1.18, 6.20)</b> | 1.85 (0.83, 4.15) |
| Q4:                | 22 | 51 | 1.62 (0.72, 3.65)        | 2.37 (1.00, 5.61) |
| <i>P</i> for trend |    |    | 0.60                     | <b>0.03</b>       |
| <b>RBP4</b>        |    |    |                          |                   |
| Q1:                | 22 | 54 | 1.00                     | 1.00              |
| Q2:                | 27 | 53 | 1.42 (0.66, 3.07)        | 1.16 (0.51, 2.62) |
| Q3:                | 22 | 54 | 1.18 (0.52, 2.68)        | 1.40 (0.61, 3.21) |
| Q4:                | 33 | 53 | 1.84 (0.88, 3.85)        | 1.06 (0.45, 2.51) |
| <i>P</i> for trend |    |    | 0.14                     | 0.92              |

---

Q, quartile; \* Model III adjust for covariates in model I and additional adjusts for pre-pregnancy BMI

**Supplementary Table 3. Adjusted odds ratio (95% CI) for the associations of GDM risk with quartiles of categories of the weighted adipokine score. Chemerin, FABP4, IL-6, leptin, sOB-R, and HMW-adiponectin at gestational weeks 10–14 and 15–26 Weighted adipokine score**

| Adipokine score categories | 10-14 GWs                 |                           | 15-26 GWs                  |                            |
|----------------------------|---------------------------|---------------------------|----------------------------|----------------------------|
|                            | Model I*                  | Model II*                 | Model I*                   | Model II*                  |
| Zero                       | 1.00                      | 1.00                      | 1.00                       | 1.00                       |
| Tertile 1                  | 1.69 (0.65, 4.40)         | 1.56 (0.59, 4.16)         | 3.24 (0.73, 14.48)         | 3.53 (0.75, 16.52)         |
| Tertile 2                  | 2.51 (1.02, 6.17)         | 2.20 (0.85, 5.72)         | <b>6.32 (1.50, 26.67)</b>  | <b>7.33 (1.62, 33.16)</b>  |
| Tertile 3                  | <b>7.51 (2.87, 19.66)</b> | <b>6.06 (2.03, 18.06)</b> | <b>14.87 (4.02, 55.02)</b> | <b>18.74 (4.19, 83.83)</b> |

Weighted adipokine score represents high-risk cutoff values of chemerin, FABP4, IL-6, leptin, sOB-R, and HMW-adiponectin expressed as ng/mL (IL-6 expressed as pg/mL).

Model I adjusts for maternal age, gestational week of blood collection, parity, family history of diabetes, parity; Model II adjust for covariates in model I and additionally adjusts for prepregnancy BMI.

Weights were derived from a model that adjusted for high-risk cutoff values of chemerin, FABP4, IL-6, leptin, sOB-R, and HMW-adiponectin, maternal age, gestational week of blood collection, parity, and family history of diabetes. At 10-14 GWs the cutoff values (weights) were: FABP4 17.7 (-0.04), Chemerin 94.9 (0.50), IL-6 1.5 (0.57), Leptin 51.1 (0.40), sOB-R 33.9 (0.74), HMW-adiponectin 6420.9 (0.51).

At 15-26 GWs the cutoff values (weights) were FABP4 16.9 (-0.001), Chemerin 98.0 (0.98), IL-6 1.6 (0.14), Leptin 55.3 (-0.02), sOB-R 39.9 (1.79), HMW-adiponectin 5464.2 (0.21).

**Supplementary Table 4. Receiver operating characteristic (ROC) curves and area under the curve (AUC) statistics for different models to predict gestational diabetes (GDM) (biomarker measured at 10-14 and 15-26 GWs)**

| Model                      | Variables included in the model                                                      | AUC (95%CI)      |
|----------------------------|--------------------------------------------------------------------------------------|------------------|
| <b>Visit 0 (10-14 GWs)</b> |                                                                                      |                  |
| Conventional               | Age, enrollment BMI categories, race, family history of diabetes, glucose            | 0.71 (0.66,0.77) |
| FABP4                      | Conventional + quartiles of FABP4                                                    | 0.73 (0.67,0.79) |
| Chemerin                   | Conventional + quartiles of chemerin                                                 | 0.74 (0.69,0.79) |
| Leptin                     | Conventional + leptin > 4th quartile value                                           | 0.72 (0.67,0.78) |
| sOB-R                      | Conventional + quartiles of sOB-R                                                    | 0.74 (0.69,0.80) |
| Adiponectin                | Conventional + quartiles of adiponectin                                              | 0.74 (0.69,0.79) |
| HMW-adiponectin            | Conventional + quartiles of HMW-adiponectin                                          | 0.74 (0.69,0.79) |
| Final model at visit 0     | Conventional+FABP4+Chemerin +sOB-R+ HMW-adiponectin                                  | 0.77 (0.72,0.82) |
| <b>Visit 1 (15-26 GWs)</b> |                                                                                      |                  |
| Conventional               | Age, enrollment BMI categories, race, family history of diabetes, glucose (>90mg/dL) | 0.75 (0.69,0.80) |
| FABP4                      | Conventional + quartiles of FABP4                                                    | 0.77 (0.72,0.82) |
| Chemerin                   | Conventional + quartiles of chemerin                                                 | 0.77 (0.71,0.82) |
| Leptin                     | Conventional + leptin > 4th quartile value                                           | 0.75 (0.70,0.81) |
| sOB-R                      | Conventional + quartiles of sOB-R                                                    | 0.79 (0.74,0.84) |
| Adiponectin                | Conventional + quartiles of adiponectin                                              | 0.77 (0.71,0.82) |
| HMW-adiponectin            | Conventional + quartiles of HMW-adiponectin                                          | 0.77 (0.72,0.82) |
| Final model at visit 1     | Conventional+FABP4+chemerin +sOB-R+ HMW-adiponectin                                  | 0.82 (0.77,0.87) |

Supplementary Material: **Adipokines in Early and Mid-Pregnancy and Subsequent Risk of Gestational Diabetes: A longitudinal study in a multi-racial cohort**

**Supplementary Figure 1.** Receiver operating characteristic (ROC) curves and area under the curve (AUC) statistics for the prediction of gestational diabetes (GDM) using conventional risk factors only (maternal age, enrollment BMI categories, family history of diabetes, glucose), conventional risk factors and the addition of adipokines at 10-14 and 15-26 GWs

**ROC curve comparisons at 10-14 GWs**

**ROC curve comparisons at 15-26 GWs**

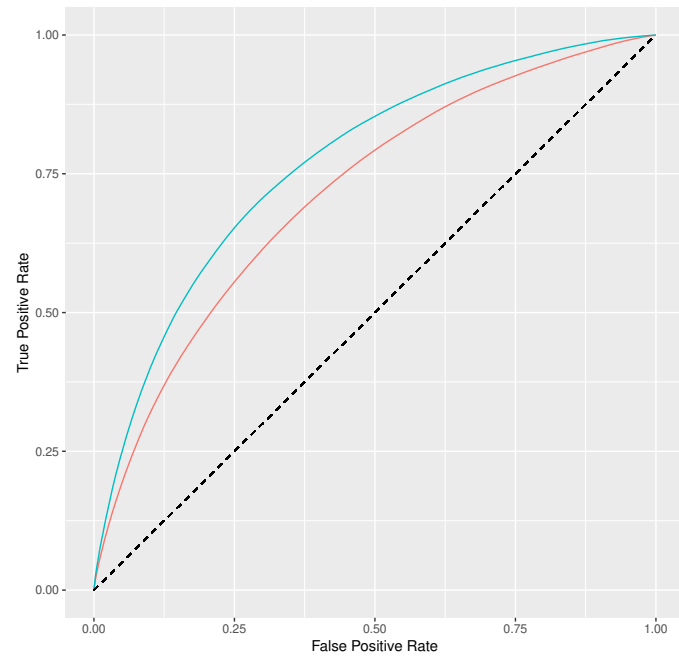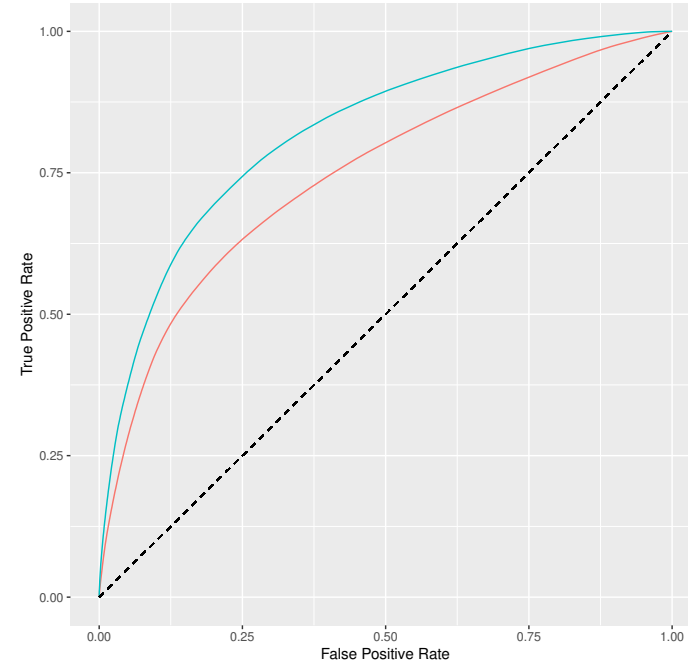

Red line: conventional model; Blue line: conventional model + adipokines

10-14 GWs - conventional model: age, enrollment BMI categories, race, family history of diabetes, glucose (>90mg/dL); final model with adipokines: conventional+FABP4+chemerin +sOB-R+ HMW-adiponectin

15-26 GWs – conventional model: age, enrollment BMI categories, race, family history of diabetes, glucose (>90mg/dL); final model with adipokines: conventional+FABP4+chemerin +sOB-R+ HMW-adiponectin
